# Supplementary material for: High-resolution crossover mapping reveals similarities and differences of male and female recombination in maize
Source: PubMed Central journal article supplement (PMC6006299; doi:10.1038/s41467-018-04562-5), 2018-06-18
Supplement: 41467_2018_4562_MOESM3_ESM.pdf [file 41467_2018_4562_MOESM3_ESM.pdf]

## **Descriptions of Additional Supplementary Files**

File Name: Supplementary Data 1

Description: This file contains the list of SNP associated with COs in male and female meioses in the B73 x Mo17 hybrid.

File Name: Supplementary Data 2

Description: This file contains the list of recombination hotspots (i.e. regions 5 kbp in length exhibiting CO rates at least five-fold higher than the genome average<sup>1</sup> ) in male and female meioses in the B73 x Mo17 hybrid.
